# Supplementary material for: Transcriptome Analysis of Stigmas of <em>Vicia faba</em> L. Flowers
Source: Preprints.org preprint supplement (doi:10.20944/preprints202312.0037.v1), 2023-12-01
Supplement: Supplementary file 1 [file Supplementary_file_2.xlsx]

## Sheet: go_enrichment_4401_AFvsAS_0.05
Supplementary file 2.GO enrichment analysis performed in TRAPID of the differentially expressed genes of autofertile vs. autosterile lines. Highlighted in green GO terms related with upregulated genes and highlighted in red GO terms related with downregulated genes.
#Aspect	GO	Enrichment_log2	q-value	subset_ratio	description
BP	GO:0016137	3.71104	0.00144446	0.187091	glycoside metabolic process
BP	GO:1901804	3.71104	0.0126273	0.140318	beta-glucoside metabolic process
BP	GO:0006022	2.97408	0.00144281	0.280636	aminoglycan metabolic process
BP	GO:0006026	2.97408	0.00144281	0.280636	aminoglycan catabolic process
BP	GO:0006030	2.97408	0.00144281	0.280636	chitin metabolic process
BP	GO:0006032	2.97408	0.00144281	0.280636	chitin catabolic process
BP	GO:0046348	2.97408	0.00144281	0.280636	amino sugar catabolic process
BP	GO:1901072	2.97408	0.00144281	0.280636	glucosamine-containing compound catabolic process
BP	GO:0016998	2.86304	0.00760762	0.233863	cell wall macromolecule catabolic process
BP	GO:1901071	2.71104	0.00420711	0.280636	glucosamine-containing compound metabolic process
BP	GO:0007266	2.71104	0.0124639	0.233863	Rho protein signal transduction
BP	GO:0035023	2.71104	0.0124639	0.233863	regulation of Rho protein signal transduction
BP	GO:0035024	2.71104	0.0124639	0.233863	negative regulation of Rho protein signal transduction
BP	GO:0046580	2.71104	0.0124639	0.233863	negative regulation of Ras protein signal transduction
BP	GO:0051058	2.71104	0.0124639	0.233863	negative regulation of small GTPase mediated signal transduction
BP	GO:0009865	2.57354	0.0179704	0.233863	pollen tube adhesion
BP	GO:0098740	2.57354	0.0179704	0.233863	multi organism cell adhesion
BP	GO:0015959	2.52662	9.29126e-05	0.5145	diadenosine polyphosphate metabolic process
BP	GO:0015961	2.52662	9.29126e-05	0.5145	diadenosine polyphosphate catabolic process
BP	GO:0015965	2.52662	9.29126e-05	0.5145	diadenosine tetraphosphate metabolic process
BP	GO:0015967	2.52662	9.29126e-05	0.5145	diadenosine tetraphosphate catabolic process
BP	GO:0051289	2.43093	0.00485839	0.327409	protein homotetramerization
BP	GO:0009166	2.41559	0.000191338	0.5145	nucleotide catabolic process
BP	GO:0046244	2.33253	0.0366206	0.233863	salicylic acid catabolic process
BP	GO:0090630	2.33253	0.0366206	0.233863	activation of GTPase activity
BP	GO:1901292	2.26358	0.000456607	0.5145	nucleoside phosphate catabolic process
BP	GO:0048015	2.22561	0.0492822	0.233863	phosphatidylinositol-mediated signaling
BP	GO:0048017	2.22561	0.0492822	0.233863	inositol lipid-mediated signaling
BP	GO:0046271	2.08301	0.00137334	0.5145	phenylpropanoid catabolic process
BP	GO:0046274	2.08301	0.00137334	0.5145	lignin catabolic process
BP	GO:0051552	2.05896	0.0193574	0.327409	flavone metabolic process
BP	GO:0046834	1.91963	0.00110552	0.608045	lipid phosphorylation
BP	GO:0046854	1.91963	0.00110552	0.608045	phosphatidylinositol phosphorylation
BP	GO:0080060	1.81795	0.0467538	0.327409	integument development
BP	GO:0080092	1.79677	0.00233401	0.608045	regulation of pollen tube growth
BP	GO:0010769	1.71104	0.00398488	0.608045	regulation of cell morphogenesis involved in differentiation
BP	GO:0060284	1.71104	0.00398488	0.608045	regulation of cell development
BP	GO:0042744	1.69114	0.000458505	0.841908	hydrogen peroxide catabolic process
BP	GO:0045492	1.55576	0.0200772	0.5145	xylan biosynthetic process
BP	GO:0045491	1.46819	0.00763064	0.70159	xylan metabolic process
BP	GO:0009556	1.44255	0.0365563	0.5145	microsporogenesis
BP	GO:0042743	1.31872	0.00421992	0.935454	hydrogen peroxide metabolic process
BP	GO:0009812	1.22917	0.000821464	1.35641	flavonoid metabolic process
BP	GO:0009813	1.13815	0.0159381	0.935454	flavonoid biosynthetic process
BP	GO:0010410	1.07473	0.0132492	1.07577	hemicellulose metabolic process
BP	GO:0009846	1.07361	0.00598843	1.26286	pollen germination
BP	GO:0042545	1.05791	0.00306258	1.44995	cell wall modification
BP	GO:0009860	1.04079	7.51491e-05	2.43218	pollen tube growth
BP	GO:0044036	1.01755	0.00394473	1.49673	cell wall macromolecule metabolic process
BP	GO:0009932	0.992225	3.68782e-05	2.80636	cell tip growth
BP	GO:0010383	0.934547	0.0185671	1.26286	cell wall polysaccharide metabolic process
BP	GO:0042546	0.888687	0.00378048	1.91768	cell wall biogenesis
BP	GO:0048588	0.886613	0.000260538	2.80636	developmental cell growth
BP	GO:0071554	0.870818	1.97255e-06	4.34986	cell wall organization or biogenesis
BP	GO:0048868	0.857145	0.000362115	2.85313	pollen tube development
BP	GO:0071669	0.815739	0.00278178	2.33863	plant-type cell wall organization or biogenesis
BP	GO:0071555	0.78504	0.00421847	2.33863	cell wall organization
BP	GO:0042440	0.745573	0.0274266	1.73059	pigment metabolic process
BP	GO:0009856	0.718175	0.000770397	3.55472	pollination
BP	GO:0044706	0.718175	0.000770397	3.55472	multi-multicellular organism process
BP	GO:0045229	0.717614	0.00613959	2.5725	external encapsulating structure organization
BP	GO:0000904	0.626318	0.012718	2.89991	cell morphogenesis involved in differentiation
BP	GO:1901615	0.602514	0.0453663	2.24509	organic hydroxy compound metabolic process
BP	GO:0009826	0.532237	0.0208675	3.36763	unidimensional cell growth
BP	GO:0048468	0.518102	0.0204659	3.55472	cell development
BP	GO:0060560	0.492622	0.0277594	3.64827	developmental growth involved in morphogenesis
BP	GO:0005975	0.354813	0.0367681	6.22077	carbohydrate metabolic process
BP	GO:0006468	0.330065	0.0418344	6.82881	protein phosphorylation
CC	GO:0070382	2.57354	0.0179704	0.233863	exocytic vesicle
CC	GO:0099503	2.57354	0.0179704	0.233863	secretory vesicle
CC	GO:0016324	2.18053	4.24873e-06	0.841908	apical plasma membrane
CC	GO:0098590	1.75168	0.000294741	0.841908	plasma membrane region
CC	GO:0042995	1.69474	3.04952e-09	2.058	cell projection
CC	GO:0120025	1.69474	3.04952e-09	2.058	plasma membrane bounded cell projection
CC	GO:0045177	1.67152	0.000530774	0.841908	apical part of cell
CC	GO:0090406	1.64437	1.23596e-07	1.73059	pollen tube
CC	GO:0044459	0.740789	0.00844282	2.29186	plasma membrane part
CC	GO:0009505	0.538657	0.0304821	3.04022	plant-type cell wall
MF	GO:0016837	3.71104	4.18313e-09	0.467727	carbon-oxygen lyase activity, acting on polysaccharides
MF	GO:0030570	3.71104	4.18313e-09	0.467727	pectate lyase activity
MF	GO:0047501	3.12608	0.0124984	0.187091	()-neomenthol dehydrogenase activity
MF	GO:0047504	3.12608	0.0124984	0.187091	(-)-menthol dehydrogenase activity
MF	GO:0010301	2.90369	0.0201651	0.187091	xanthoxin dehydrogenase activity
MF	GO:0017048	2.71104	0.0124639	0.233863	Rho GTPase binding
MF	GO:0004568	2.59556	0.00668128	0.280636	chitinase activity
MF	GO:0004081	2.52662	9.29126e-05	0.5145	bis(5'-nucleosyl)-tetraphosphatase (asymmetrical) activity
MF	GO:0008796	2.52662	9.29126e-05	0.5145	bis(5'-nucleosyl)-tetraphosphatase activity
MF	GO:0004867	2.42154	0.000980707	0.420954	serine-type endopeptidase inhibitor activity
MF	GO:0004430	2.38911	0.013337	0.280636	1-phosphatidylinositol 4-kinase activity
MF	GO:0052742	2.38911	0.013337	0.280636	phosphatidylinositol kinase activity
MF	GO:0034432	2.36312	0.00027081	0.5145	bis(5'-adenosyl)-pentaphosphatase activity
MF	GO:0016308	2.34847	0.00691095	0.327409	1-phosphatidylinositol-4-phosphate 5-kinase activity
MF	GO:0017137	2.33253	0.0366206	0.233863	Rab GTPase binding
MF	GO:0045548	2.33253	0.0366206	0.233863	phenylalanine ammonia-lyase activity
MF	GO:0008893	2.31249	0.000346257	0.5145	guanosine-3',5'-bis(diphosphate) 3'-diphosphatase activity
MF	GO:0016794	2.31249	0.000346257	0.5145	diphosphoric monoester hydrolase activity
MF	GO:0004564	2.25161	0.00466047	0.374181	beta-fructofuranosidase activity
MF	GO:0004575	2.25161	0.00466047	0.374181	sucrose alpha-glucosidase activity
MF	GO:0015299	2.14714	1.57283e-07	1.07577	solute:proton antiporter activity
MF	GO:0004551	2.12608	0.00110993	0.5145	nucleotide diphosphatase activity
MF	GO:0016841	2.12608	0.015776	0.327409	ammonia-lyase activity
MF	GO:0015298	2.10532	2.64748e-07	1.07577	solute:cation antiporter activity
MF	GO:0005545	2.04808	0.0406683	0.280636	1-phosphatidylinositol binding
MF	GO:0016682	2.02299	0.00664458	0.420954	oxidoreductase activity, acting on diphenols and related substances as donors, oxygen as acceptor
MF	GO:0030599	1.94551	0.000300445	0.70159	pectinesterase activity
MF	GO:0090599	1.85306	0.0227975	0.374181	alpha-glucosidase activity
MF	GO:0016840	1.82352	0.009867	0.467727	carbon-nitrogen lyase activity
MF	GO:0016759	1.67542	0.0177837	0.467727	cellulose synthase activity
MF	GO:0016760	1.67542	0.0177837	0.467727	cellulose synthase (UDP-forming) activity
MF	GO:0004857	1.5798	4.46213e-08	1.96445	enzyme inhibitor activity
MF	GO:0051020	1.5131	0.00275908	0.795136	GTPase binding
MF	GO:0004650	1.47838	0.0446462	0.467727	polygalacturonase activity
MF	GO:0017016	1.45728	0.0161322	0.608045	Ras GTPase binding
MF	GO:0031267	1.45728	0.0161322	0.608045	small GTPase binding
MF	GO:0030414	1.38912	0.0457245	0.5145	peptidase inhibitor activity
MF	GO:0061134	1.38912	0.0457245	0.5145	peptidase regulator activity
MF	GO:0015297	1.10141	0.00301592	1.35641	antiporter activity
MF	GO:0046527	1.08426	0.00128042	1.59027	glucosyltransferase activity
MF	GO:0030234	1.07877	1.55511e-06	3.04022	enzyme regulator activity
MF	GO:0052689	1.0547	0.0156416	1.07577	carboxylic ester hydrolase activity
MF	GO:0098772	1.03619	1.61601e-06	3.27409	molecular function regulator
MF	GO:0004601	0.993182	0.0499014	0.888681	peroxidase activity
MF	GO:0035251	0.990192	0.0121076	1.26286	UDP-glucosyltransferase activity
MF	GO:0004553	0.961505	1.7404e-06	3.74181	hydrolase activity, hydrolyzing O-glycosyl compounds
MF	GO:0016798	0.885988	9.44407e-06	3.78859	hydrolase activity, acting on glycosyl bonds
MF	GO:0015291	0.760255	0.015745	1.91768	secondary active transmembrane transporter activity
MF	GO:0020037	0.733207	0.0198211	1.91768	heme binding
MF	GO:0046906	0.646531	0.049603	1.91768	tetrapyrrole binding
MF	GO:0016758	0.57688	0.0271772	2.75959	transferase activity, transferring hexosyl groups
MF	GO:0016788	0.410385	0.0163794	5.75304	hydrolase activity, acting on ester bonds
MF	GO:0016787	0.294924	0.000196931	19.551	hydrolase activity
MF	GO:0003824	0.152469	0.000354369	45.3695	catalytic activity
