# Supplementary material for: Transcriptome Analysis of Stigmas of <em>Vicia faba</em> L. Flowers
Source: Preprints.org preprint supplement (doi:10.20944/preprints202312.0037.v1), 2023-12-01
Supplement: Supplementary file 2 [file Supplementary_file_3.xls]

## Sheet: Hoja1
Supplementary file 3. QTLs for autofertility traits in the RIL population Vf6 x Vf27 (Aguilar-Benitez et al. submitted), number of markers within each of the QTLs intervals, markers associated with a known genome sequence and number of markers associated with a transcriptome DEGs. PSF: pod set field measure; PSC: pod set under insect proof cages; PST: pod set after tripping treatment; SSF: seed s…
QTL	CHR	# MARKERS IN THE INTERVAL	# MARKERS ASSOCIATED WITH GENOMIC SEQUENCES	# MARKERS ASSOCIATED WITH DEGs
PSF_2009/10	I	8	7	1
PSC_2014/15	I	21	18	1
PST_2014/15	I	29	26	0
PSF_2012/13	I	14	13	1
SSF_2012/13	I	23	21	1
%RUPT	I	6	6	0
SL	I	29	24	2
SL/FL	I	16	13	2
TOTALS	II	5	4	0
NORMALQ	II	15	13	1
NORMAL%	II	12	10	0
RATIO_PSIZE	II	14	12	0
STIGL	III	9	7	0
PSC_2008/09	IV	20	17	2
PSF_2006/07	IV	42	40	4
PSF_2010/11	IV	105	95	12
SL	IV	21	20	0
PAPL	IV	7	7	1
OL	VI	13	12	0
SL	VI	16	15	0
SSF_2012/13	VI	29	24	1
NORMALQ	VI	8	7	2
TOTALS	VI	6	5	1
NORMAL%	VI	5	4	1
RATIO_PSIZE	VI	6	5	1
SSC_2009/10	VI	9	8	1
OL/FL	VI	13	13	1
NPAP/STIGL	VI	19	15	0
RUPTL	VI	10	7	0
%RUPT	VI	10	7	0
%RUPTAREA	VI	4	4	0
