# Supplementary material for: Transcriptome Analysis of Stigmas of <em>Vicia faba</em> L. Flowers
Source: Preprints.org preprint supplement (doi:10.20944/preprints202312.0037.v1), 2023-12-01
Supplement: Supplementary file 3 [file Supplementary_file_4.xls]

## Sheet: Hoja1
Supplementary file 4. BLASTx searches for the genes comprised in the QTL interval for the rupture of the cuticle.
Highlighted in bold those genes that matched with differentially expressed genes from the expression analysis.
Vicia faba gene	Protein ID	Organism	Protein description
6g024800.1	XP_050899303.1	Pisum sativum	heavy metal-associated isoprenylated plant protein 3-like
6g024880.1	XP_050904994.1	Pisum sativum	annexin Gh1-like
6g024920.1	KHM98913.1	Glycine soja	4-coumarate--CoA ligase-like 7
6g024960.1	XP_050893646.1	Pisum sativum	lactoylglutathione lyase isoform X1
6g025000.1	CAI8616356.1	Vicia faba	unnamed protein product
6g025120.1	XP_050900644.1	Pisum sativum	transcription factor RAX2-like
6g025160.1	XP_004506058.1	Cicer arietinum	protein N-lysine methyltransferase METTL21A
6g025240.1	XP_050900705.1	Pisum sativum	Serine carboxypeptidase-like 48
6g025280.1	XP_050895134.1	Pisum sativum	serine carboxypeptidase-like
6g025360.1	XP_050900705.1	Pisum sativum	serine carboxypeptidase-like
6g025400.1	XP_050900706.1	Pisum sativum	vacuolar protein sorting-associated protein 24 homolog 1-like
6g025440.1	MCI36774.1	Trifolium medium	F-box/FBD/LRR-repeat protein
6g025480.1	XP_050899856.1	Pisum sativum	high-affinity nitrate transporter 2.1-like
6g025520.1	XP_050899558.1	Pisum sativum	uncharacterized protein LOC127106297
6g025560.1	XP_050921089.1	Pisum sativum	eukaryotic initiation factor 4A-15-like
6g025640.1	XP_050899078.1	Pisum sativum	F-box/kelch-repeat protein At3g06240-like
6g025680.1	XP_050898474.1	Pisum sativum	F-box protein CPR1-like
6g025840.1	XP_050894980.1	Pisum sativum	ribonuclease 1-like
6g025880.1	WJX93878.1	Trifolium repens	ribonuclease T2
6g025920.1	CAI8616372.1	Vicia faba	unnamed protein product
6g025960.1	XP_050896868.1	Pisum sativum	F-box/kelch-repeat protein At3g06240-like
6g026000.1	XP_050896868.1	Pisum sativum	F-box/kelch-repeat protein At3g06240-like
6g026040.1	XP_050896868.1	Pisum sativum	F-box/kelch-repeat protein At3g06240-like
6g026080.1	XP_050896868.1	Pisum sativum	F-box/kelch-repeat protein At3g06240-like
6g026120.1	XP_050896868.1	Pisum sativum	F-box/kelch-repeat protein At3g06240-like
6g026160.1	XP_050896868.1	Pisum sativum	F-box/kelch-repeat protein At3g06240-like
6g026200.1	XP_050896868.1	Pisum sativum	F-box/kelch-repeat protein At3g06240-like
6g026240.1	CAI8616380.1	Vicia faba	unnamed protein product
6g026280.1	CAI8616381.1	Vicia faba	unnamed protein product
6g026320.1	XP_050896868.1	Pisum sativum	F-box/kelch-repeat protein At3g06240-like
6g026360.1	XP_050896833.1	Pisum sativum	protein SMALL AUXIN UP-REGULATED RNA 54-like
6g026400.1	XP_050900770.1	Pisum sativum	ABC transporter F family member 1
6g026440.1	XP_050880216.1	Pisum sativum	protein DA1-related 2-like
6g026480.1	CAI8616386.1	Vicia faba	unnamed protein product
6g026480.2	CAI8616387.1	Vicia faba	unnamed protein product
6g026560.1	XP_050898556.1	Pisum sativum	P-loop NTPase domain-containing protein LPA1 homolog 2-like isoform X1
6g026640.1	XP_050899856.1	Pisum sativum	high-affinity nitrate transporter 2.1-like
6g026680.1	XP_050896480.1	Pisum sativum	lysM domain receptor-like kinase 4
6g026720.1	XP_050896479.1	Pisum sativum	alpha carbonic anhydrase 7
6g026760.1	XP_050896479.1	Pisum sativum	alpha carbonic anhydrase 7
6g026800.1	XP_050900019.1	Pisum sativum	BEL1-like homeodomain protein 8
6g026840.1	XP_050900146.1	Pisum sativum	uncharacterized protein LOC127106899
6g026880.1	XP_050899030.1	Pisum sativum	ATPase GET3B-like
6g026920.1	XP_050899031.1	Pisum sativum	ABC transporter G family member 28
6g027000.1	XP_050900736.1	Pisum sativum	ruBisCO large subunit-binding protein subunit alpha, chloroplastic
